# Supplementary material for: CD122 signaling in CD8+ memory T cells drives costimulation-independent rejection
Source: JCI journal article supplement (doi:10.1172/jci95914), 2018-09-16
Supplement: sd1 [file 1]

## Bela + $\alpha$ CD122

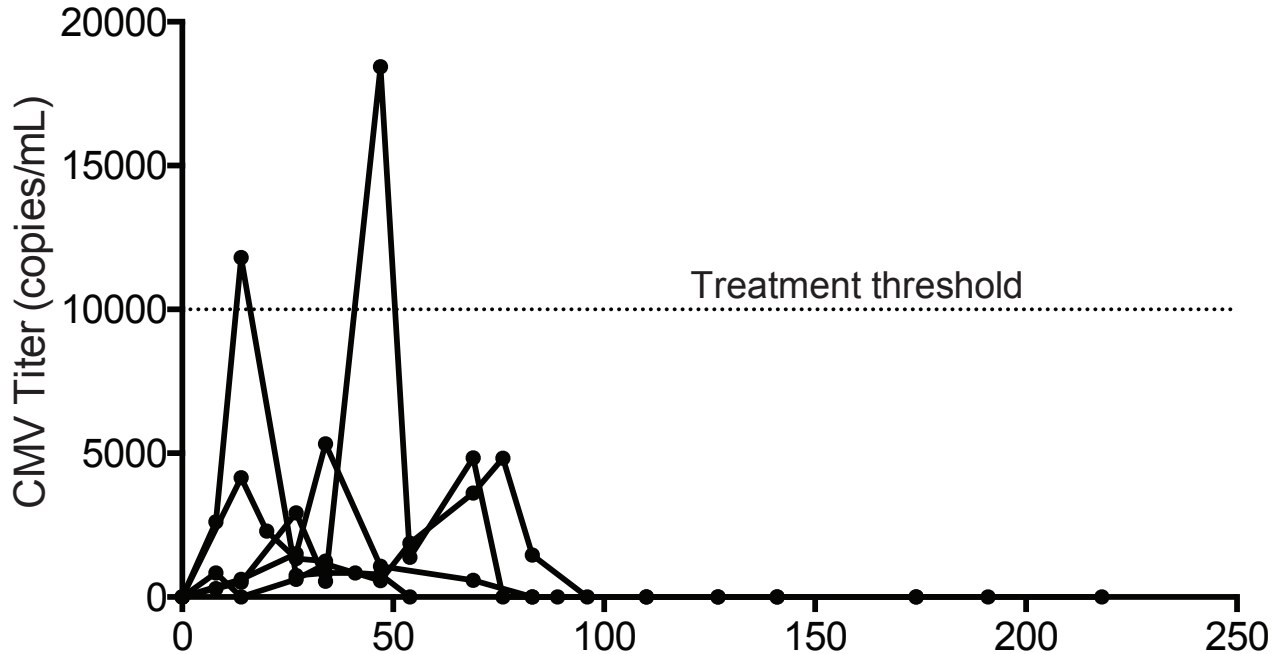

**Supplemental Figure 1 CMV Reactivation** Animals treated with Belatacept+  $\alpha$ CD122 were monitored weekly for CMV reactivation, defined as greater than 10,000 copies of viral DNA/ul of blood, as measured by quantitative PCR. Two animals experienced CMV reactivation during therapy, which was well controlled with CMV anti-viral therapy (ganciclovir) and did not recur.
